# Supplementary figures and images for: Oligodendrocyte-encoded Kir4.1 function is required for axonal integrity
Source: eLife journal article supplement (doi:10.7554/elife.36428), 2018-09-11

Figure 1 - figure supplement 1:

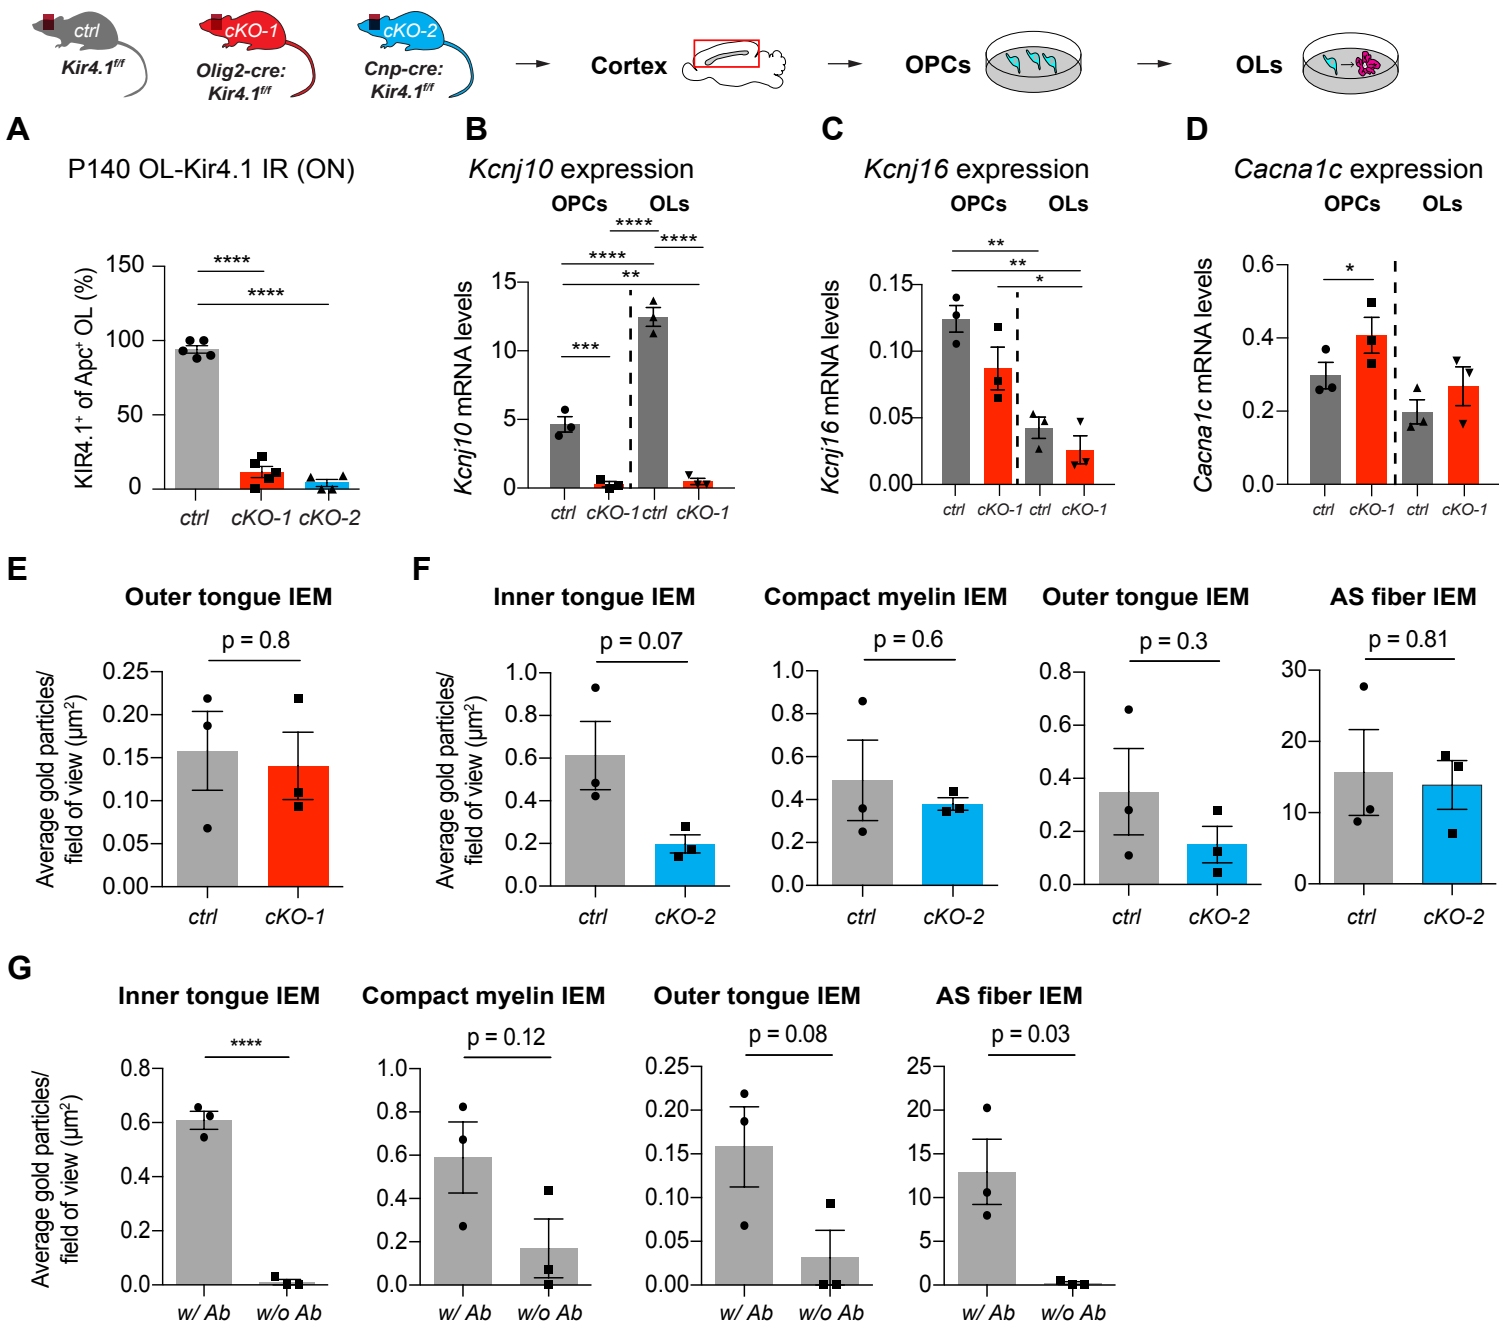

Supplement: supp [file elife_poa_e36428_Figure_1_figure_supplement_1.pdf › elife_poa_e36428_Figure_1_figure_supplement_1.pdf]

Figure 1 - figure supplement 2:

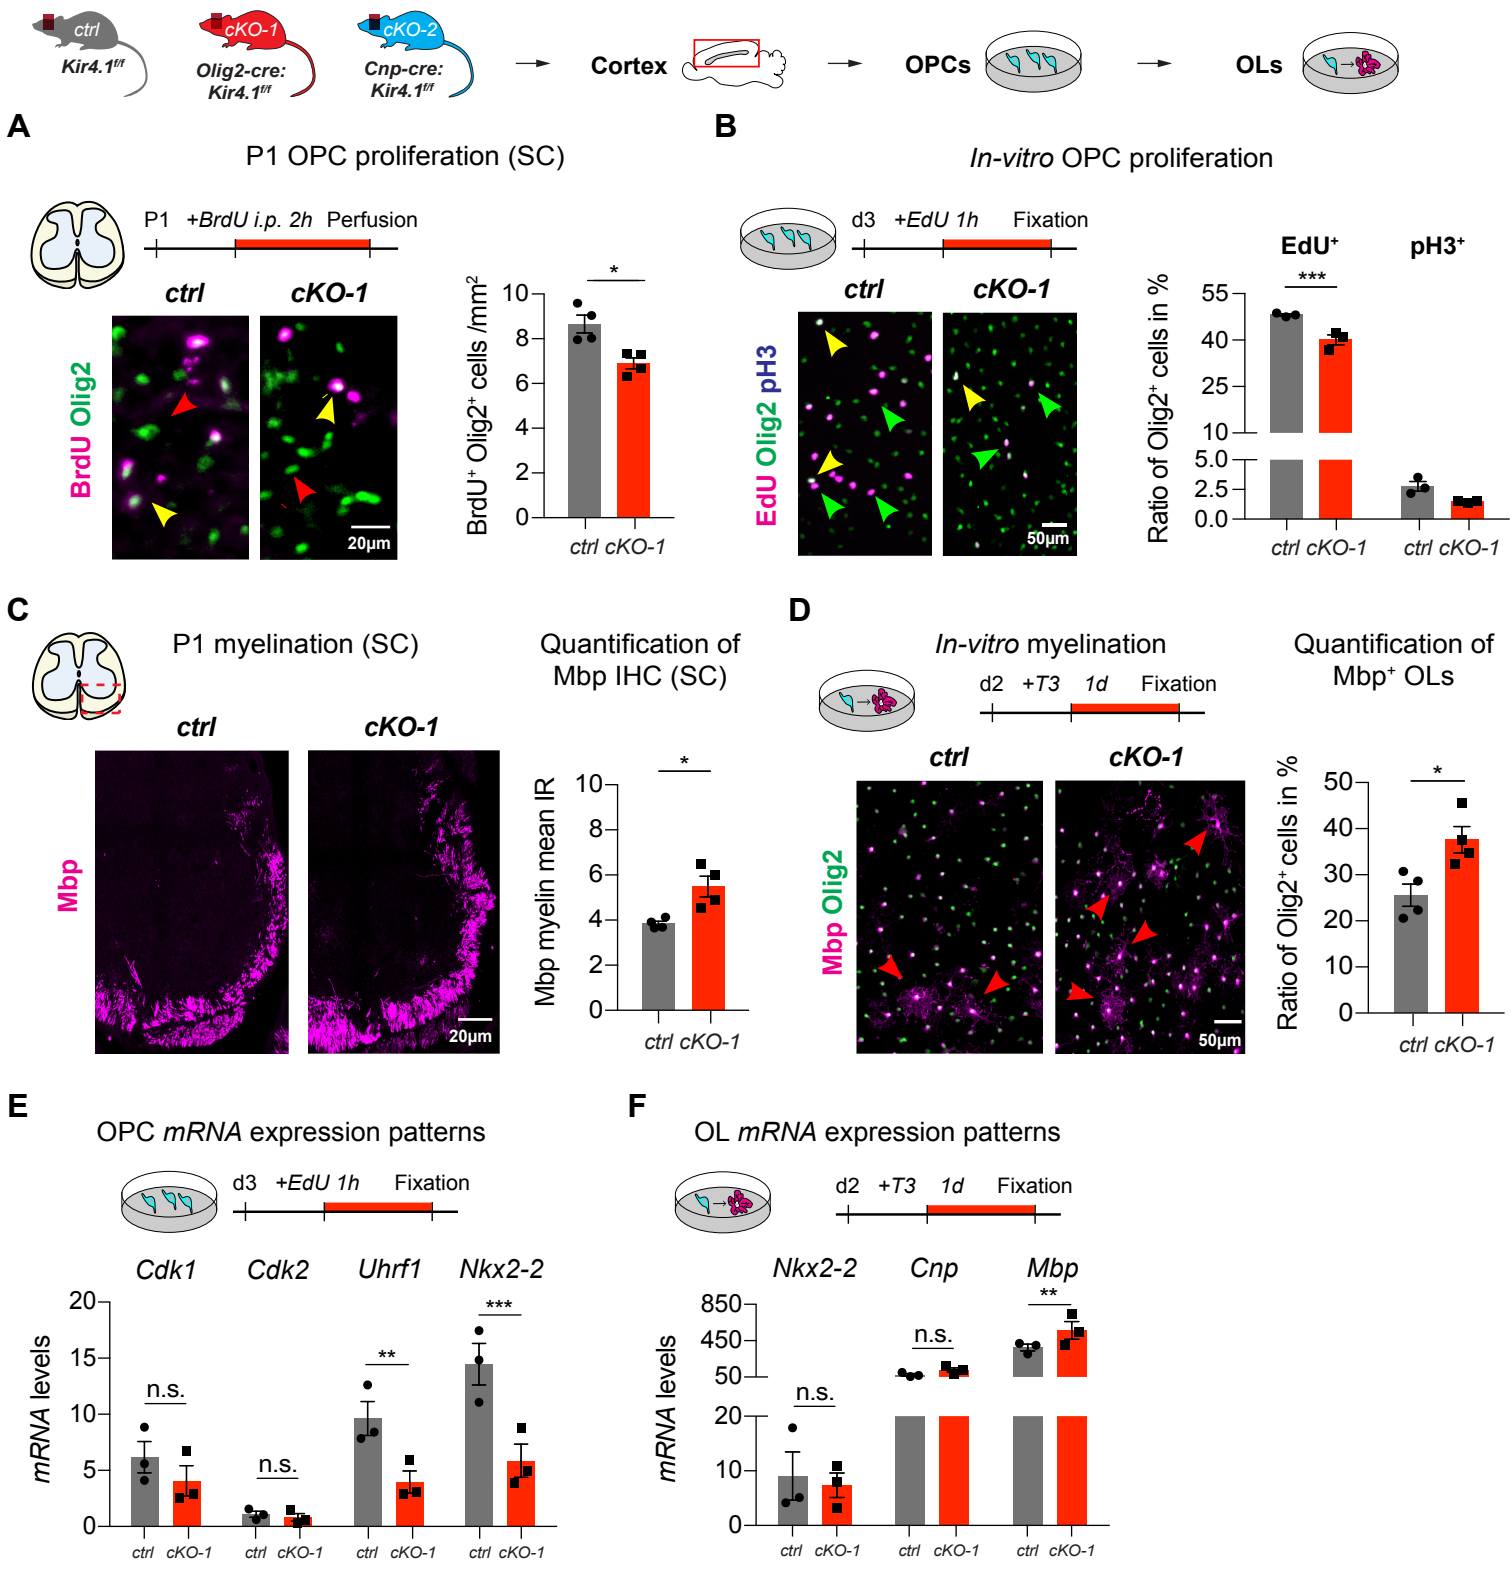

Supplement: supp [file elife_poa_e36428_Figure_1_figure_supplement_2.pdf › elife_poa_e36428_Figure_1_figure_supplement_2.pdf]

**Figure 2 - figure supplement 1:**

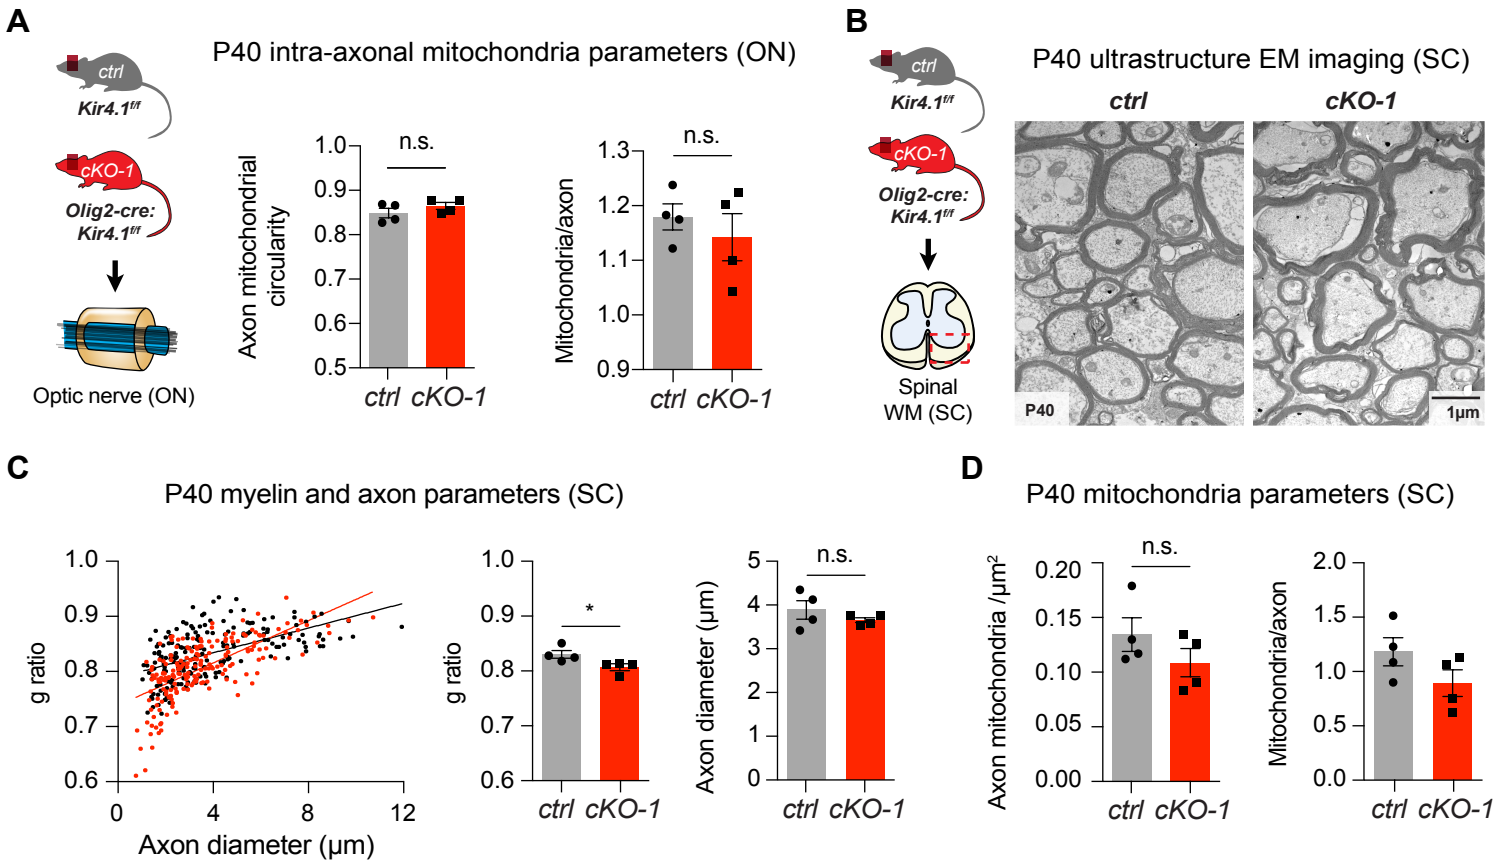

Supplement: supp [file elife_poa_e36428_Figure_2_figure_supplement_1.pdf › elife_poa_e36428_Figure_2_figure_supplement_1.pdf]

Figure 4 - figure supplement 1:

A

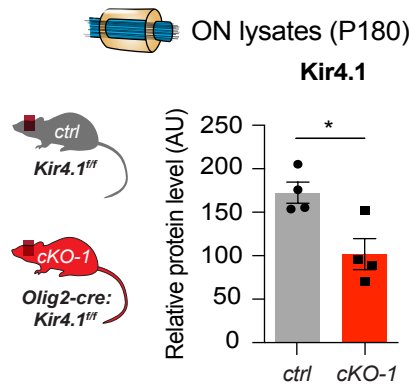

B

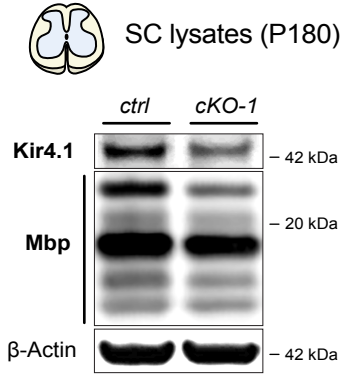

C

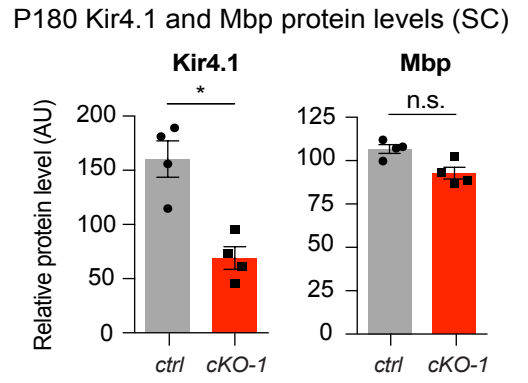

D

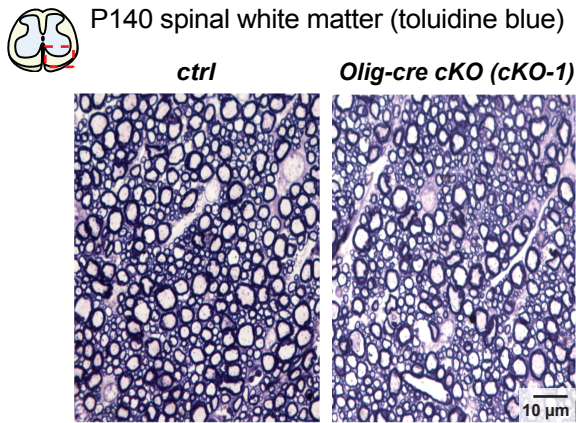

E

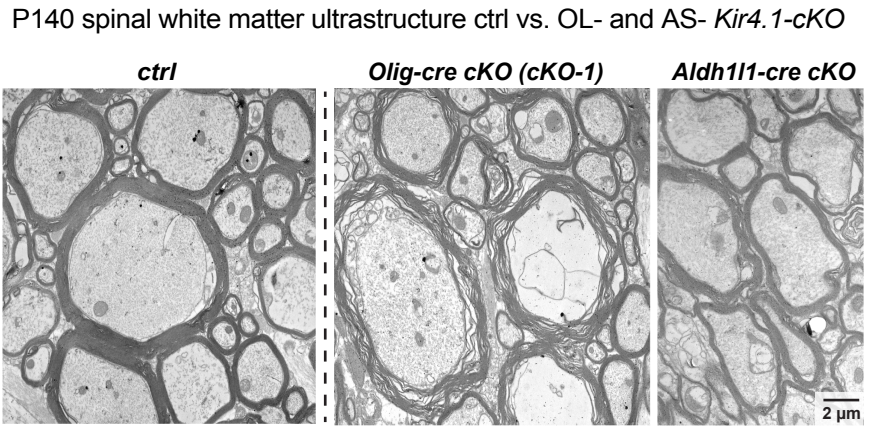

F

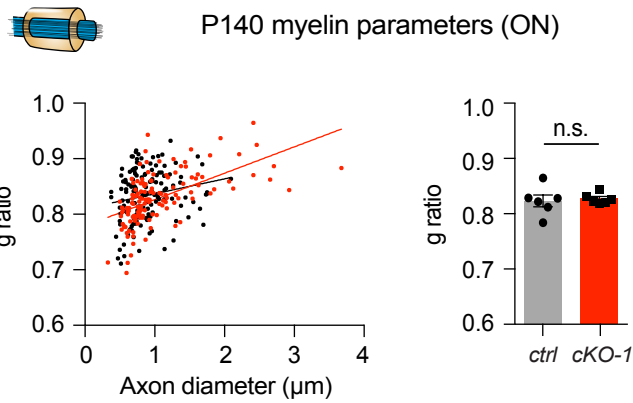

G

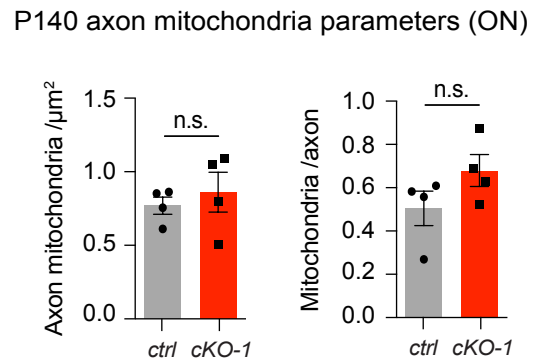

Supplement: supp [file elife_poa_e36428_Figure_4_figure_supplement_1.pdf › elife_poa_e36428_Figure_4_figure_supplement_1.pdf]

**Figure 4 - figure supplement 2:**

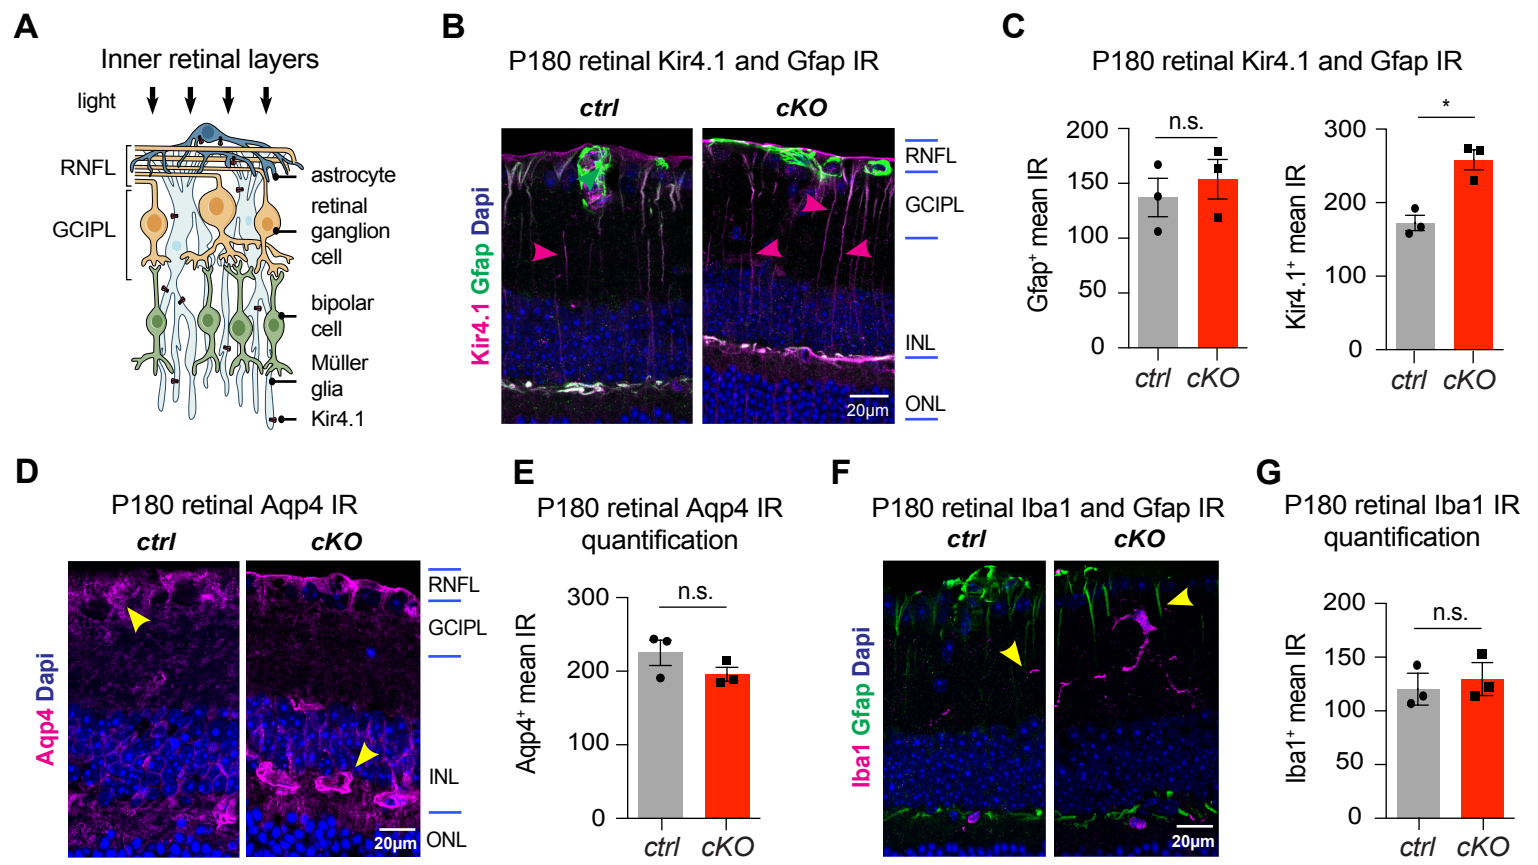

Supplement: supp [file elife_poa_e36428_Figure_4_figure_supplement_2.pdf › elife_poa_e36428_Figure_4_figure_supplement_2.pdf]

Figure 5 - figure supplement 1:

A

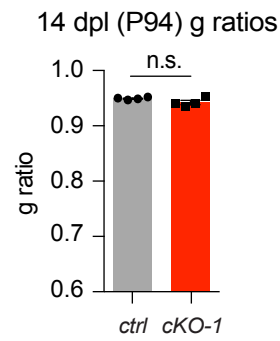

B

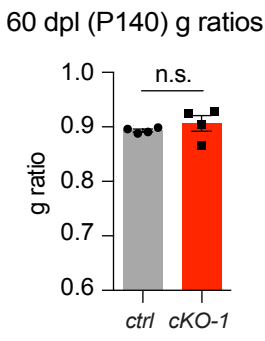

Supplement: supp [file elife_poa_e36428_Figure_5_figure_supplement_1.pdf › elife_poa_e36428_Figure_5_figure_supplement_1.pdf]
